# Supplementary material for: Direct and sensitive detection of sulfide ions based on one-step synthesis of ionic liquid functionalized fluorescent carbon nanoribbons
Source: Royal Society of Chemistry journal article supplement (doi:10.1039/c9ra07701d), 2019-01-01
Supplement: c9ra07701d1.pdf [file c9ra07701d1.pdf]

## Supplementary Material:

### Tables

**Table S1.** Comparison between fluorescent detection of  $S^{2-}$  using different probes.

| Fluorescent probe          | DL<br>( $\mu\text{M}$ ) | Linear range<br>( $\mu\text{M}$ ) | Ref.      |
|----------------------------|-------------------------|-----------------------------------|-----------|
| PEI-FITC- $\text{Cu}^{2+}$ | 1.2                     | 10-100                            | 43        |
| CDs- $\text{Ag}^+$         | 0.43                    | 0-100                             | 44        |
| TPI-H- $\text{Cu}^{2+}$    | 0.156                   | -                                 | 45        |
| Au nanoclusters            | 0.38                    | 0.5-80                            | 46        |
| Lys- $\text{Ag}$ NCs       | 1.1                     | 5-100                             | 47        |
| GQDs- $\text{Cu}^{2+}$     | 0.1                     | 0.2-20                            | 48        |
| Cu nanoclusters            | 0.01                    | 0.02–0.8                          | 49        |
| Cu nanoclusters            | 0.042                   | 0.2–50                            | 50        |
| Au nanoclusters-Ce(III)    | 0.015                   | 0-2                               | 51        |
| AgNPs-CDs                  | 0.01                    | 0.01-0.9                          | 52        |
| IL-CNRs                    | 0.085                   | 0.1-1.0, 1.0-300                  | This work |

CDs- $\text{Ag}^+$ , carbon dots- $\text{Ag}^+$ ; PEI-FITC, covalent linking fluorescein isothiocyanate with branched-polyethylenimine; TPI-H, triarylimidazole chromophore; Lys- $\text{Ag}$  NCs, lysozyme-stabilized silver nanoclusters;  $\text{Eu}^{3+}$ -BHHCT-BPED, AgNPs-CDs, silver nanoparticles capped with carbon dots; GQDs, graphene quantum dots.

**Table S2.** Detection of  $S^{2-}$  in tap water samples.

| Sample <sup>a</sup> | Concentration of $S^{2-}$ ( $\mu\text{M}$ ) |                       | RSD<br>(n=3, %) | Recovery<br>(%) |
|---------------------|---------------------------------------------|-----------------------|-----------------|-----------------|
|                     | Added                                       | Determined by IL-CNRs |                 |                 |
| 1                   | 0.80                                        | 0.83                  | 2.3             | 103.8           |
| 2                   | 10.00                                       | 9.37                  | 2.5             | 93.7            |
| 3                   | 50.00                                       | 48.44                 | 1.9             | 96.9            |

<sup>a</sup>  $S^{2-}$  in the original tap water is not detected. Recovery=determined concentration/added value $\times$ 100%.

## Figures

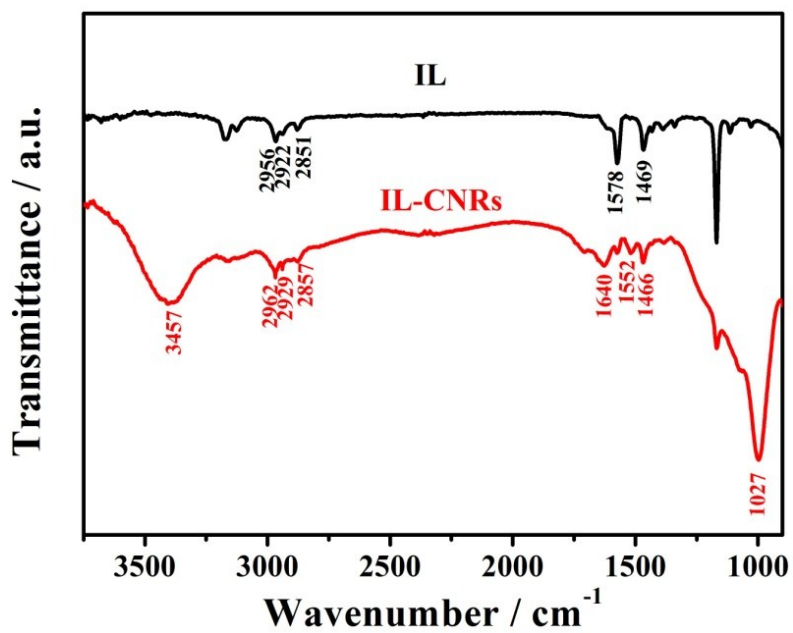

Fig. S1. FTIR spectra of IL and IL-CNRs.

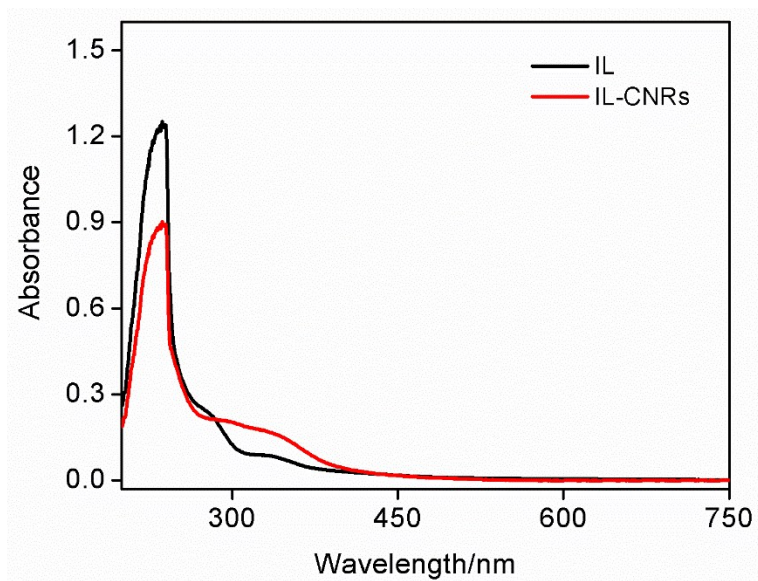

Fig. S2. UV-Vis spectra of IL and IL-CNRs.

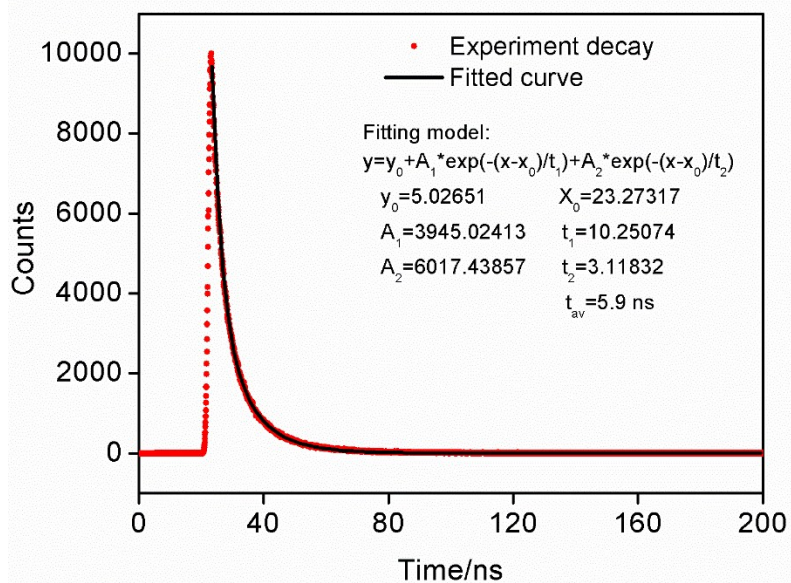

**Fig. S3.** Fluorescence lifetime spectrum of IL-CNRs.

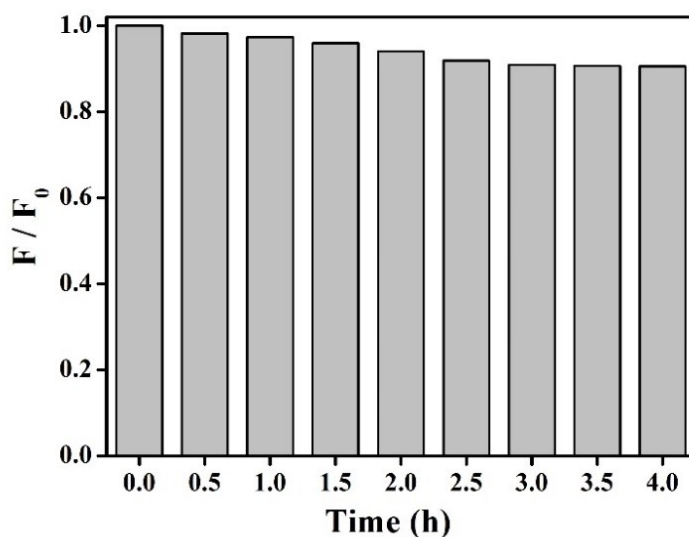

**Fig. S4.** The fluorescence intensity ratio of IL-CNRs under UV light (365 nm) irradiation for different time.  $F_0$  and  $F$  were the fluorescence intensity of IL-CNRs before and after UV light irradiation, respectively.

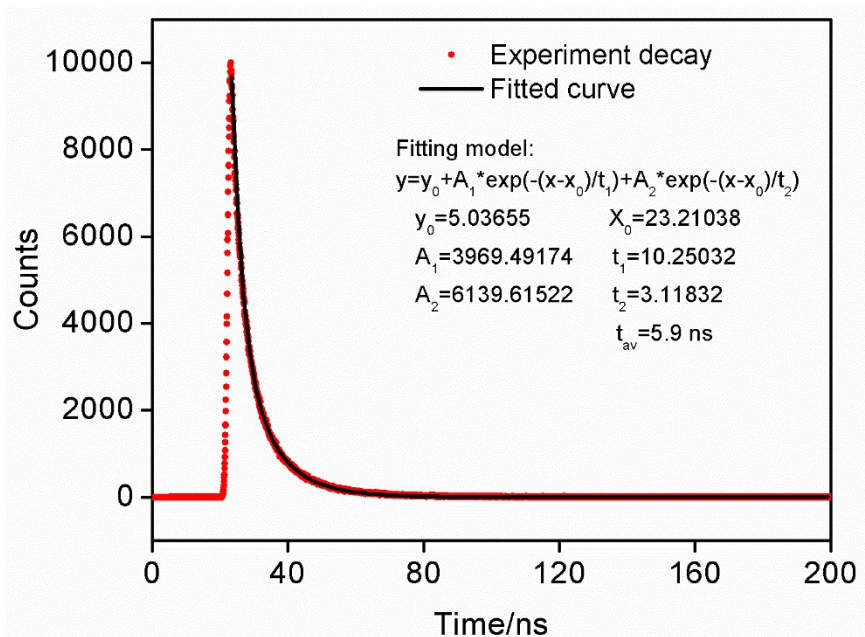

**Fig. S5.** Fluorescence lifetime spectrum of IL-CNRs in presence of  $S^{2-}$ .

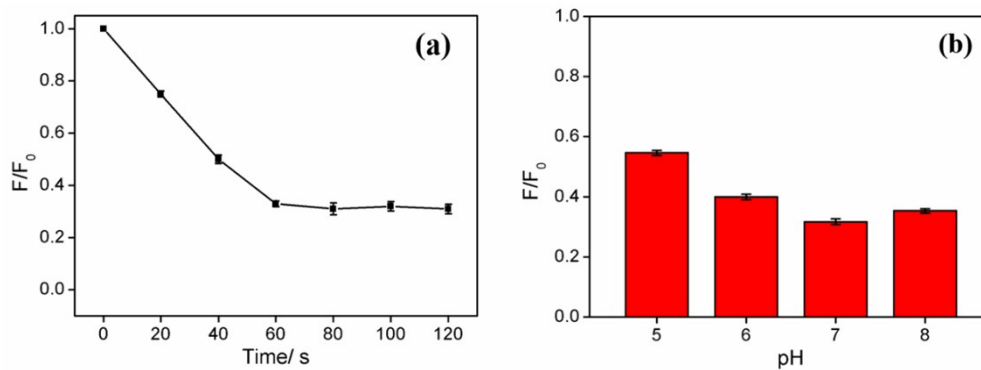

**Fig. S6.** The effects of incubation time and pH on the fluorescence intensity ratio by  $S^{2-}$ .
